# Supplementary material for: Whole-genome sequencing for analysis of an outbreak of meticillin-resistant Staphylococcus aureus: a descriptive study
Source: PubMed Central journal article supplement (PMC3556525; doi:10.1016/s1473-3099(12)70268-2), 2013-02
Supplement: mmc1.pdf [file mmc1.pdf]

## Supplementary webappendix

This webappendix formed part of the original submission and has been peer reviewed. We post it as supplied by the authors.

Supplement to: Harris SR, Cartwright EJP, Török ME, et al. Whole-genome sequencing for analysis of an outbreak of meticillin-resistant *Staphylococcus aureus*: a descriptive study. *Lancet Infect Dis* 2012; published online Nov 14. [http://dx.doi.org/10.1016/S1473-3099\(12\)70268-2](http://dx.doi.org/10.1016/S1473-3099(12)70268-2).

**Supplement for ‘Whole-genome sequencing for analysis of an outbreak of  
meticillin-resistant *Staphylococcus aureus*: a descriptive study’**

Simon R. Harris PhD, Edward J.P. Cartwright MBBS, M. Estée Török FRCP, Matthew T.G. Holden PhD, Nicholas M. Brown FRCPATH, Amanda L. Ogilvy-Stuart FRCP, Matthew J. Ellington DPhil, Michael A. Quail PhD, Stephen D. Bentley PhD, Prof. Julian Parkhill PhD, Prof. Sharon J. Peacock FRCP

## **METHODS**

Mapping of sequenced data and variation detection were carried out using an automated in-house pipeline.

### **Mapping**

Sequenced reads were mapped against the ST22 reference (HO 5096 0412) using SMALT v 0.5.8 (<http://www.sanger.ac.uk/resources/software/smalt/>) to produce bam files. Reads were only mapped if they matched the reference with an identity of greater than 90%.

### **Indel identification and realignment**

As mapping programmes align each read in isolation, insertion and deletion (indel) positions in reads relative to the reference sequence are not always consistently aligned across all reads. This can lead to misidentification of variation around indels. To reduce this potential error the pipeline assesses the evidence for indels across the genome and, once strongly supported indels are identified, realigns the reads in their vicinity. First, candidate indels relative to the reference were identified with pindel.<sup>1</sup> For each candidate indel, relevant reads (those mapping within 1 read length of the indel and those not mapping against the reference sequence in the initial mapping) were remapped against a version of the genome with the proposed indel included, and mapping statistics compared to that without the indel. Where multiple indels were found within a read length, combinations of presence and absence of each indel were compared. Where the inclusion of an indel improved mapping, the indel was accepted. A final mapping was completed against a version of the reference including all accepted indels, to produce a bam file whose co-ordinates were adjusted to fit the original reference sequence.

### **Variation detection**

Variation statistics at each base were calculated using samtools mpileup followed by bcftools view from the samtools package.<sup>2</sup> All bases were then filtered to remove those with uncertainty in the base call. The bcftools variant quality score was required to be greater than 50 and mapping quality greater than 30. If not all reads gave the same base call, the allele frequency, as calculated by bcftools, was required to be either 0 for bases called the same as the reference, or 1 for bases called as a SNP. The majority base call was required to be present in at least 80% of reads mapping at the base, and the minimum mapping depth

allowed was 4 reads, at least two of which had to map to each strand. If any of these filters were not met, the base was called as uncertain.

### **Phylogenetic analysis**

Phylogenetic reconstruction was carried out using the maximum-likelihood programme RAxML v 7.0.4<sup>3</sup> with a GTR model of evolution. SNPs were reconstructed onto the tree using the deltran parsimony criterion using a script written in biopython.

### **References**

1. Ye, K., Schulz, M. H., Long, Q., Apweiler, R. & Ning, Z. Pindel: a pattern growth approach to detect break points of large deletions and medium sized insertions from paired-end short reads. *Bioinformatics* **25**, 2865–2871 (2009).
2. Li, H. *et al.* The Sequence Alignment/Map format and SAMtools. *Bioinformatics* **25**, 2078–2079 (2009).
3. Stamatakis, A. RAxML-VI-HPC: maximum likelihood-based phylogenetic analyses with thousands of taxa and mixed models. *Bioinformatics* **22**, 2688–2690 (2006).

Table S1. Antimicrobial susceptibility pattern of MRSA isolates.

| ID                                                                                     | Cefoxitin | Ciprofloxacin | Erythromycin | Fusidic Acid | Gentamicin | Mupirocin | Rifampicin | Tetracycline | Vancomycin | Neomycin |
|----------------------------------------------------------------------------------------|-----------|---------------|--------------|--------------|------------|-----------|------------|--------------|------------|----------|
|  H    | Red       | Red           | Blue         | Red          | White      | White     | White      | White        | Red        | Red      |
| 26    | Red       | Red           | Red          | Red          | White      | White     | White      | White        | Red        | Red      |
| 25    | Red       | Red           | Red          | Red          | White      | White     | White      | White        | Red        | Red      |
| 24    | Red       | Red           | White        | Red          | White      | White     | White      | White        | Red        | Red      |
| 23    | Red       | Red           | Red          | Red          | White      | White     | White      | White        | Red        | Red      |
| 22    | Red       | Red           | Red          | Red          | White      | White     | White      | White        | Red        | Red      |
| 21    | Red       | Red           | Red          | Red          | White      | White     | White      | White        | Red        | Red      |
| 20    | Red       | Red           | Red          | Red          | White      | White     | White      | White        | Red        | Red      |
| 19    | Red       | Red           | Red          | Red          | White      | White     | White      | White        | Red        | Red      |
| 17    | Red       | Red           | Red          | Red          | White      | White     | White      | White        | Red        | Red      |
| 16    | Red       | Red           | Red          | Red          | White      | White     | White      | White        | Red        | Red      |
| 15   | Red       | Red           | White        | Red          | White      | White     | White      | White        | Red        | Red      |
| 14  | Red       | Red           | Red          | Red          | White      | White     | White      | White        | Red        | Red      |
| 13  | Red       | Red           | Red          | Red          | White      | White     | White      | White        | Green      | Red      |
| 12  | Red       | Red           | Red          | Red          | White      | White     | White      | White        | Red        | Red      |
| 11  | Red       | Red           | Red          | Red          | White      | White     | White      | White        | Red        | Red      |
| 10  | Red       | Red           | Red          | Red          | White      | White     | White      | White        | Red        | Red      |
| 9   | Red       | Red           | Red          | Red          | White      | White     | White      | White        | Red        | Red      |
| 8   | Red       | Red           | Red          | Red          | White      | White     | White      | White        | Red        | Red      |
| 7   | Red       | Red           | Red          | Red          | White      | White     | White      | White        | Red        | Red      |
| 6   | Red       | Red           | Red          | Red          | White      | White     | White      | White        | Red        | Red      |
| 5   | Red       | Red           | Red          | Red          | White      | White     | White      | White        | Red        | Red      |
| 4   | Red       | Red           | Red          | Red          | White      | White     | White      | White        | Red        | Red      |
| 3   | Red       | Red           | Red          | Green        | White      | White     | White      | White        | Green      | Red      |
| 2   | Red       | Red           | Red          | Red          | White      | White     | White      | White        | Red        | Red      |
| 1   | Red       | Red           | Red          | Green        | White      | White     | White      | White        | Green      | Red      |

Key:  
 Infant   
 Mother   
 Partner   
 Healthcare worker 

Red means resistant and white means susceptible to a given antibiotic. Green, initial result proved incorrect on repeat testing and changed designation from susceptible to resistant. A healthcare worker had twenty MRSA colonies taken from the primary plate; the blue box for erythromycin signifies that some colonies were susceptible to this antibiotic (n=18) and some were resistant (n=2).

Table S2. Accession numbers of genome sequence data for each MRSA isolate. Deposited at the European Nucleotide Archive (ENA, <http://www.ebi.ac.uk/ena/>).

| Name in paper                                                                                               | MLST      | Accession number | Involved in outbreak? |
|-------------------------------------------------------------------------------------------------------------|-----------|------------------|-----------------------|
| P1                                                                                                          | ST2371    | ERR070045        | Yes                   |
| P2                                                                                                          | ST2371    | ERR070042        | Yes                   |
| P3                                                                                                          | ST2371    | ERR070043        | Yes                   |
| P4                                                                                                          | ST2371    | ERR070044        | Yes                   |
| P5                                                                                                          | ST2371    | ERR070046        | Yes                   |
| P6                                                                                                          | ST2371    | ERR070047        | Yes                   |
| P7                                                                                                          | ST2371    | ERR070048        | Yes                   |
| P8                                                                                                          | ST2371    | ERR070033        | Yes                   |
| P9                                                                                                          | ST2371    | ERR070034        | Yes                   |
| P10                                                                                                         | ST2371    | ERR070036        | Yes                   |
| P11                                                                                                         | ST2371    | ERR070039        | Yes                   |
| P12                                                                                                         | ST2371    | ERR070040        | Yes                   |
| P13                                                                                                         | ST2371    | ERR070038        | Yes                   |
| P14                                                                                                         | ST2371    | ERR072246        | Yes                   |
| P15                                                                                                         | ST2371    | ERR108054        | Yes                   |
| P16                                                                                                         | ST2371    | ERR124429        | Yes                   |
| P17                                                                                                         | ST2371    | ERR124430        | Yes                   |
| P19                                                                                                         | ST2371    | ERR124432        | Yes                   |
| P20                                                                                                         | ST2371    | ERR124431        | Yes                   |
| P21                                                                                                         | ST2371    | ERR124433        | Yes                   |
| P22                                                                                                         | ST2371    | ERR124434        | Yes                   |
| P23                                                                                                         | ST2371    | ERR072247        | Yes                   |
| P24                                                                                                         | ST2371    | ERR124435        | Yes                   |
| P25                                                                                                         | ST2371    | ERR128708        | Yes                   |
| P26                                                                                                         | ST2371    | ERR128707        | Yes                   |
| Healthcare worker, MRSA colonies 1-20 picked from primary culture plate inoculated with MRSA screening swab | ST2371    | ERR128709        | Yes                   |
|                                                                                                             | ST2371    | ERR128710        |                       |
|                                                                                                             | ST2371    | ERR128711        |                       |
|                                                                                                             | ST2371    | ERR128712        |                       |
|                                                                                                             | ST2371    | ERR131808        |                       |
|                                                                                                             | ST2371    | ERR131809        |                       |
|                                                                                                             | ST2371    | ERR131810        |                       |
|                                                                                                             | ST2371    | ERR131811        |                       |
|                                                                                                             | ST2371    | ERR131812        |                       |
|                                                                                                             | ST2371    | ERR131813        |                       |
|                                                                                                             | ST2371    | ERR131814        |                       |
|                                                                                                             | ST2371    | ERR131815        |                       |
|                                                                                                             | ST2371    | ERR128713        |                       |
|                                                                                                             | ST2371    | ERR128714        |                       |
|                                                                                                             | ST2371    | ERR128715        |                       |
|                                                                                                             | ST2371    | ERR128716        |                       |
| ST2371                                                                                                      | ERR128717 |                  |                       |
| ST2371                                                                                                      | ERR128718 |                  |                       |

|                                                                                                                                                                                     |        |           |    |
|-------------------------------------------------------------------------------------------------------------------------------------------------------------------------------------|--------|-----------|----|
|                                                                                                                                                                                     | ST2371 | ERR128719 |    |
|                                                                                                                                                                                     | ST2371 | ERR128720 |    |
| Identified by Infection Control investigation, non-outbreak                                                                                                                         | ST1    | ERR070041 | No |
|                                                                                                                                                                                     | ST8    | ERR070035 | No |
|                                                                                                                                                                                     | ST22   | ERR070037 | No |
| MRSA identified by searching microbiology database and based on criterion that the antibiogram was no more than one antibiotic different to the MRSA outbreak antibiogram (P11/P12) | ST772  | ERR072248 | No |
|                                                                                                                                                                                     | ST772  | ERR124436 | No |
|                                                                                                                                                                                     | ST772  | ERR131800 | No |
|                                                                                                                                                                                     | ST772  | ERR131804 | No |
|                                                                                                                                                                                     | ST22   | ERR131801 | No |
|                                                                                                                                                                                     | ST22   | ERR131802 | No |
|                                                                                                                                                                                     | ST22   | ERR131805 | No |
|                                                                                                                                                                                     | ST22   | ERR131806 | No |
| Reference MRSA isolated used for mapping (strain number HO 5096 0412)                                                                                                               | ST22   | ERR131807 | No |
|                                                                                                                                                                                     | ST22   | HE681097  | No |
